# Supplementary material for: Genetic variations in the PSMA6 and PSMC6 proteasome genes are associated with multiple sclerosis and response to interferon-β therapy in Latvians
Source: PubMed Central journal article supplement — Exp Ther Med. 2021 Mar 12;21(5):478. doi: 10.3892/etm.2021.9909 (PMC7976443; doi:10.3892/etm.2021.9909), 2021-03-12
Supplement: Supplementary_Data.pdf [file Supplementary_Data.pdf]

Figure S1. Examples of the DNA sequencing chromatograms for *PSMA6*: rs2277460 (A1: genotype CC; A2: genotype CA) and rs1048990 (B1: CC; B2: GG), *PSMC6*: rs2295826 (C1: AA; C2: GG) and rs2295827 (D1: CC; D2: TT) and *PSMA3* rs2348071 (E1: GG; E2: AA) described in the present study. On chromatograms, the sites of localization of the studied SNPs are marked in grey. Allelic variants in the sequence are in bold and underlined.

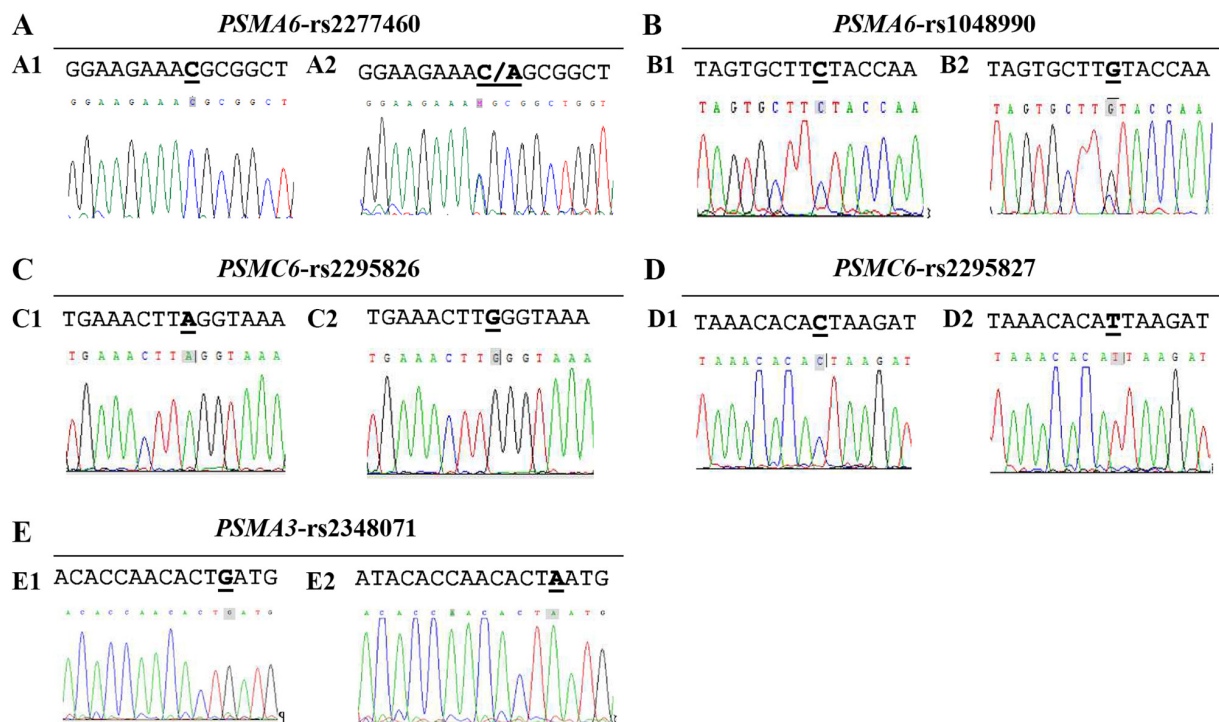

Table SI. 14q SNP genotype polymorphisms and correlation with gene expression level (profile) of related genes, including: (1) genes-candidates for MS and (2) IFN  $\alpha/\beta$  signalling pathway genes, for HapMap unrelated subjects of CEU, YRI, HCB and JPT HapMap populations grouped in one HapMap unrelated subjects cohort.

A, rs1048990 (C/G) with MS susceptible genes; Genetic model, D; Genetic Factor, G

| Genotype number (frequency) | Gene symbol    | Chr. locus | Correlation between genotype and gene expression |                                  |                     |
|-----------------------------|----------------|------------|--------------------------------------------------|----------------------------------|---------------------|
|                             |                |            | Expression chip probe GI                         | Expression level (mean $\pm$ SD) | P-value             |
| -                           | CD6            | 11q12.2    | GI_5802993-S                                     | -                                | n/s                 |
| CC 137 (0.65)               | CD58           | 1p13.1     | GI_4502676-S                                     | 11.82 $\pm$ 0.24                 | 0.0040 <sup>a</sup> |
| CG 58 (0.28)                | -              | -          | -                                                | 11.92 $\pm$ 0.23                 | -                   |
| GG 14 (0.07)                | -              | -          | -                                                | 11.96 $\pm$ 0.26                 | -                   |
| CC 137 (0.65)               | HLA-A          | 6p22.1     | GI_24797066-S                                    | 12.14 $\pm$ 1.54                 | 0.041 <sup>a</sup>  |
| CG 58 (0.28)                | -              | -          | -                                                | 11.65 $\pm$ 1.75                 | -                   |
| GG 14 (0.07)                | -              | -          | -                                                | 11.72 $\pm$ 1.51                 | -                   |
| -                           | HLA-B          | 6p21.33    | GI_21327676-S                                    | -                                | n/s                 |
| -                           | HLA-DRB1       | 6p21.32    | GI_4504410-S                                     | -                                | n/s                 |
| -                           | IL2RA          | 10p15.1    | GI_4557666-S                                     | -                                | n/s                 |
| CC 137 (0.65)               | IL7R           | 5p13.2     | GI_28610150-S                                    | 6.29 $\pm$ 0.21                  | 0.042 <sup>a</sup>  |
| CG 58 (0.28)                | -              | -          | -                                                | 6.23 $\pm$ 0.13                  | -                   |
| GG 14 (0.07)                | -              | -          | -                                                | 6.22 $\pm$ 0.17                  | -                   |
| -                           | IL12A          | 3q25.33    | GI_24430218-S                                    | -                                | n/s                 |
| -                           | IRF8 (ICSBP)   | 16q24.1    | GI_4504566-S                                     | -                                | n/s                 |
| CC 137 (0.65)               | STAT3          | 17q21.2    | GI_21618337-A                                    | 11.06 $\pm$ 0.38                 | 0.041 <sup>a</sup>  |
| CG 58 (0.28)                | -              | -          | -                                                | 11.15 $\pm$ 0.36                 | -                   |
| GG 14 (0.07)                | -              | -          | -                                                | 11.28 $\pm$ 0.56                 | -                   |
| -                           | TNFRSF1A       | 12p13.31   | GI_23312372-S                                    | -                                | -                   |
| CC 137 (0.65)               | TNFRSF5 (CD40) | 20q13.12   | GI_23312370-A                                    | 9.91 $\pm$ 0.35                  | 0.0019 <sup>a</sup> |
| CG 58 (0.28)                | -              | -          | -                                                | 10.09 $\pm$ 0.39                 | -                   |
| GG 14 (0.07)                | -              | -          | -                                                | 10.02 $\pm$ 0.32                 | -                   |

B, rs1048990 with IFN  $\alpha/\beta$  signalling pathway genes; Genetic model, D; Genetic factor, G

| Genotype number (frequency) | Gene symbol            | Chr. locus | Correlation between genotype and gene expression |                                  |                     |
|-----------------------------|------------------------|------------|--------------------------------------------------|----------------------------------|---------------------|
|                             |                        |            | Expression chip probe GI                         | Expression level (mean $\pm$ SD) | P-value             |
| -                           | IFI6 (GIP3)            | 1p36.11    | GI_13259551-A                                    | -                                | n/s                 |
| CC 137 (0.65)               | IFNA1 (IFN- $\alpha$ ) | 9p21.3     | GI_13128949-S                                    | 5.88 $\pm$ 0.09                  | 0.0021 <sup>a</sup> |
| CG 58 (0.28)                | -                      | -          | -                                                | 5.93 $\pm$ 0.10                  | -                   |
| GG 14 (0.07)                | -                      | -          | -                                                | 5.90 $\pm$ 0.08                  | -                   |
| -                           | IFNAR1                 | 21q22.11   | GI_10835182-S                                    | -                                | n/s                 |
| -                           | IFNAR2                 | 21q22.11   | GI_19923128-S                                    | -                                | n/s                 |
| -                           | IFNB1                  | 9p21.3     | GI_4504602-S                                     | -                                | n/s                 |
| CC 137 (0.65)               | IRF1                   | 5q31.1     | GI_4504720-S                                     | 10.67 $\pm$ 0.32                 | 0.035 <sup>a</sup>  |
| CG 58 (0.28)                | -                      | -          | -                                                | 10.78 $\pm$ 0.34                 | -                   |
| GG 14 (0.07)                | -                      | -          | -                                                | 10.73 $\pm$ 0.38                 | -                   |
| -                           | IRF2                   | 4q35.1     | GI_4755144-S                                     | -                                | n/s                 |
| -                           | ISG15 (GIP2)           | 1p36.33    | GI_4826773-S                                     | -                                | n/s                 |
| -                           | ISG54 (IFIT2)          | 10q23.31   | GI_34222091-S                                    | -                                | n/s                 |
| -                           | ISGF3 (IRF9)           | 14q12      | GI_25282406-S                                    | -                                | n/s                 |
| -                           | JAK1                   | 1p31.3     | GI_4504802-S                                     | -                                | n/s                 |
| -                           | PML (MYL)              | 15q24.1    | GI_15451762-I                                    | -                                | n/s                 |
| -                           | PML (MYL)              | 15q24.1    | GI_15451776-A                                    | -                                | n/s                 |
| -                           | PRMT1 (HRMT1L2)        | 19q13.33   | GI_38195083-I                                    | -                                | n/s                 |
| -                           | PRMT1 (HRMT1L2)        | 19q13.33   | GI_38195086-A                                    | n/s                              | n/s                 |
| CC 137 (0.65)               | PTP-1B (PTPN1)         | 20q13.13   | GI_18104977-S                                    | 11.06 $\pm$ 0.23                 | 0.015 <sup>a</sup>  |
| CG 58 (0.28)                | -                      | -          | -                                                | 11.12 $\pm$ 0.25                 | -                   |

Table SI. Continued.

B, rs1048990 with IFN  $\alpha/\beta$  signalling pathway genes; Genetic model, D; Genetic factor, G

| Genotype number (frequency) | Gene symbol           | Chr. locus | Correlation between genotype and gene expression |                                  |                      |
|-----------------------------|-----------------------|------------|--------------------------------------------------|----------------------------------|----------------------|
|                             |                       |            | Expression chip probe GI                         | Expression level (mean $\pm$ SD) | P-value              |
| GG 14 (0.07)                | -                     | -          | -                                                | 11.22 $\pm$ 0.26                 | -                    |
| -                           | <i>SHP-1 (PTPN6)</i>  | 12p13.31   | GI_34328901-A                                    | -                                | n/s                  |
| -                           | <i>SHP-1 (PTPN6)</i>  | 12p13.31   | GI_34328901-I                                    | -                                | n/s                  |
| -                           | <i>SHP-1 (PTPN6)</i>  | 12p13.31   | GI_34328902-I                                    | -                                | n/s                  |
| -                           | <i>SHP-2 (PTPN11)</i> | 12q24.13   | GI_33356176-S                                    | -                                | n/s                  |
| -                           | <i>SOCS1</i>          | 16p13.13   | GI_4507232-S                                     | -                                | n/s                  |
| -                           | <i>STAT1</i>          | 2q32.2     | GI_21536299-I                                    | -                                | n/s                  |
| -                           | <i>STAT1</i>          | 2q32.2     | GI_21536300-A                                    | -                                | n/s                  |
| -                           | <i>STAT1</i>          | 2q32.2     | GI_21536300-I                                    | -                                | n/s                  |
| -                           | <i>STAT2</i>          | 12q13.3    | GI_38202247-S                                    | -                                | n/s                  |
| CC 137 (0.65)               | <i>TYK2</i>           | 19p13.2    | GI_34222294-S                                    | 9.84 $\pm$ 0.25                  | 0.001 <sup>a</sup>   |
| CG 58 (0.28)                | -                     | -          | -                                                | 9.76 $\pm$ 0.27                  | -                    |
| GG 14 (0.07)                | -                     | -          | -                                                | 9.77 $\pm$ 0.24                  | -                    |
| CC 137 (0.65)               | <i>USP18</i>          | 22q11.21   | GI_32313609-S                                    | 9.76 $\pm$ 0.58                  | 0.001 <sup>a</sup> - |
| CG 58 (0.28)                | -                     | -          | -                                                | 10.08 $\pm$ 0.55                 | -                    |
| GG 14 (0.07)                | -                     | -          | -                                                | 9.84 $\pm$ 0.48                  | -                    |

C, rs2295826 (A/G) with MS susceptible genes; Genetic Model, D; Genetic Factor, G

| Genotype number (frequency) | Gene symbol           | Chr. locus | Correlation between genotype and gene expression |                                  |                      |
|-----------------------------|-----------------------|------------|--------------------------------------------------|----------------------------------|----------------------|
|                             |                       |            | Expression chip probe GI                         | Expression level (mean $\pm$ SD) | P-value              |
| -                           | <i>CD6</i>            | 11q13      | GI_5802993-S                                     | -                                | n/s                  |
| -                           | <i>CD40 (TNFRSF5)</i> | 20q13.12   | GI_23312370-A                                    | -                                | n/s                  |
| AA 152 (0.72)               | <i>CD58</i>           | 1p13.1     | GI_4502676-S                                     | 11.88 $\pm$ 0.24                 | 0.048 <sup>a</sup>   |
| AG 56 (0.27)                | -                     | -          | -                                                | 11.80 $\pm$ 0.25                 | -                    |
| GG 2 (0.01)                 | -                     | -          | -                                                | 11.96 $\pm$ 0.38                 | -                    |
| -                           | <i>HLA-A</i>          | 6p22.1     | GI_24797066-S                                    | n/s                              | -                    |
| AA 152 (0.72)               | <i>HLA-B</i>          | 6p21.33    | GI_21327676-S                                    | 14.31 $\pm$ 0.27                 | 0.004 <sup>a</sup> - |
| AG 56 (0.27)                | -                     | -          | -                                                | 14.42 $\pm$ 0.25                 | -                    |
| GG 2 (0.01)                 | -                     | -          | -                                                | 14.65 $\pm$ 0.56                 | -                    |
| -                           | <i>HLA-DRB1</i>       | 6p21.32    | GI_4504410-S                                     | -                                | n/s                  |
| -                           | <i>IL2RA</i>          | 10p15.1    | GI_4557666-S                                     | -                                | n/s                  |
| -                           | <i>IL7R</i>           | 5p13.2     | GI_28610150-S                                    | -                                | n/s                  |
| -                           | <i>IL12A</i>          | 3q25.33    | GI_24430218-S                                    | -                                | n/s                  |
| -                           | <i>IRF8 (ICSBP1)</i>  | 16q24.1    | GI_4504566-S                                     | -                                | n/s                  |
| AA 152 (0.72)               | <i>STAT3</i>          | 17q21.2    | GI_21618337-A                                    | 11.06 $\pm$ 0.39                 | 0.019 <sup>a</sup> - |
| AG 56 (0.27)                | -                     | -          | -                                                | 11.18 $\pm$ 0.37                 | -                    |
| GG 2 (0.01)                 | -                     | -          | -                                                | 11.66 $\pm$ 0.56                 | -                    |
| -                           | <i>TNFRSF1A</i>       | 12p13.31   | GI_23312372-S                                    | -                                | n/s                  |

D, rs2295826 (A/G) with IFN  $\alpha/\beta$  signaling pathway genes; Genetic Model, D; Genetic Factor, G

| Genotype number (frequency) | Gene symbol        | Chr. locus | Correlation between genotype and gene expression |                                  |                      |
|-----------------------------|--------------------|------------|--------------------------------------------------|----------------------------------|----------------------|
|                             |                    |            | Expression chip probe GI                         | Expression level (mean $\pm$ SD) | P-value              |
| AA 152 (0.72)               | <i>IFI6 (GIP3)</i> | 1p36.11    | GI_13259551-A                                    | 12.52 $\pm$ 0.58                 | 0.041 <sup>a</sup> - |
| AG 56 (0.27)                | -                  | -          | -                                                | 12.67 $\pm$ 0.46                 | -                    |
| GG 2 (0.01)                 | -                  | -          | -                                                | 13.34 $\pm$ 0.20                 | -                    |

Table SI. Continued.

D, rs2295826 (A/G) with IFN  $\alpha/\beta$  signaling pathway genes; Genetic Model, D; Genetic Factor, G

| Genotype number (frequency) | Gene symbol            | Chr. locus | Correlation between genotype and gene expression |                                  |                    |
|-----------------------------|------------------------|------------|--------------------------------------------------|----------------------------------|--------------------|
|                             |                        |            | Expression chip probe GI                         | Expression level (mean $\pm$ SD) | P-value            |
| -                           | <i>IFNA1</i>           | 9p21.3     | GI_13128949-S                                    | -                                | -                  |
| -                           | <i>IFNAR1</i>          | 21q22.11   | GI_10835182-S                                    | -                                | -                  |
| -                           | <i>IFNAR2</i>          | 21q22.11   | GI_19923128-S                                    | -                                | -                  |
| -                           | <i>IFNB1</i>           | 9p21.3     | GI_4504602-S                                     | -                                | -                  |
| -                           | <i>IRF1</i>            | 5q31.1     | GI_4504720-S                                     | -                                | -                  |
| AA 152 (0.72)               | <i>IRF2</i>            | 4q35.1     | GI_4755144-S                                     | 7.66 $\pm$ 0.36                  | 0.026 <sup>a</sup> |
| AG 56 (0.27)                | -                      | -          | -                                                | 7.80 $\pm$ 0.44                  | -                  |
| GG 2 (0.01)                 | -                      | -          | -                                                | 7.81 $\pm$ 0.56                  | -                  |
| -                           | <i>ISG15 (GIP2)</i>    | 1p36.33    | GI_4826773-S                                     | -                                | n/s                |
| -                           | <i>ISG54 (IFIT2)</i>   | 10q23.31   | GI_34222091-S                                    | -                                | n/s                |
| -                           | <i>ISGF3 (IRF9)</i>    | 14q12      | GI_25282406-S                                    | -                                | n/s                |
| -                           | <i>JAK1</i>            | 1p31.3     | GI_4504802-S                                     | -                                | n/s                |
| -                           | <i>PML</i>             | 15q24.1    | GI_15451762-I                                    | -                                | n/s                |
| -                           | <i>PML</i>             | 15q24.1    | GI_15451776-A                                    | -                                | n/s                |
| -                           | <i>PRMT1 (HRMT1L2)</i> | 19q13.33   | GI_38195083                                      | -                                | n/s                |
| -                           | <i>PRMT1 (HRMT1L2)</i> | 19q13.33   | GI_38195086-A                                    | -                                | n/s                |
| -                           | <i>PTP-1B (PTPN1)</i>  | 20q13.13   | GI_18104977-S                                    | -                                | n/s                |
| -                           | <i>SHP-1 (PTPN6)</i>   | 12p13.31   | GI_34328901-A                                    | -                                | n/s                |
| -                           | <i>SHP-1 (PTPN6)</i>   | 12p13.31   | GI_34328901-I                                    | -                                | n/s                |
| -                           | <i>SHP-1 (PTPN6)</i>   | 12p13.31   | GI_34328902-I                                    | -                                | n/s                |
| -                           | <i>SHP-2 (PTPN11)</i>  | 12q24.13   | GI_33356176-S                                    | -                                | n/s                |
| -                           | <i>SOCS1</i>           | 16p13.13   | GI_4507232-S                                     | -                                | n/s                |
| -                           | <i>STAT1</i>           | 2q32.2     | GI_21536299-I                                    | -                                | n/s                |
| -                           | <i>STAT1</i>           | 2q32.2     | GI_21536300-A                                    | -                                | n/s                |
| -                           | <i>STAT1</i>           | 2q32.2     | GI_21536300-I                                    | -                                | n/s                |
| AA 152 (0.72)               | <i>STAT2</i>           | 12q13.3    | GI_38202247-S                                    | 11.06 $\pm$ 0.34                 | 0.021 <sup>a</sup> |
| AG 56 (0.27)                | -                      | -          | -                                                | 11.17 $\pm$ 0.33                 | -                  |
| GG 2 (0.01)                 | -                      | -          | -                                                | 11.57 $\pm$ 0.38                 | -                  |
| -                           | <i>TYK2</i>            | 19p13.2    | GI_34222294-S                                    | -                                | n/s                |
| -                           | <i>USP18</i>           | 22q11.21   | GI_32313609-S                                    | -                                | n/s                |

E, rs2295827 (C/T) with MS susceptible genes; Genetic Model, D; Genetic Factor, T

| Genotype number (frequency) | Gene symbol           | Chr. locus | Correlation between genotype and gene expression |                                  |                    |
|-----------------------------|-----------------------|------------|--------------------------------------------------|----------------------------------|--------------------|
|                             |                       |            | Expression chip probe GI                         | Expression level (mean $\pm$ SD) | P-value            |
| -                           | <i>CD6</i>            | 11q13      | GI_5802993-S                                     | -                                | n/s                |
| -                           | <i>CD40 (TNFRSF5)</i> | 20q13.12   | GI_23312370-A                                    | -                                | n/s                |
| -                           | <i>CD58</i>           | 1p13.1     | GI_4502676-S                                     | -                                | n/s                |
| CC 164 (0.78)               | <i>HLA-A</i>          | 6p22.1     | GI_24797066-S                                    | 12.08 $\pm$ 1.58                 | 0.036 <sup>a</sup> |
| CT 44 (0.21)                | -                     | -          | -                                                | 11.46 $\pm$ 1.76                 | -                  |
| TT 2 (0.01)                 | -                     | -          | -                                                | 12.61 $\pm$ 0.32                 | -                  |
| CC 164 (0.78)               | <i>HLA-B</i>          | 6p21.33    | GI_21327676-S                                    | 14.32 $\pm$ 0.27                 | 0.030 <sup>a</sup> |
| CT 44 (0.21)                | -                     | -          | -                                                | 14.40 $\pm$ 0.26                 | -                  |
| TT 2 (0.01)                 | -                     | -          | -                                                | 14.65 $\pm$ 0.56                 | -                  |
| -                           | <i>HLA-DRB1</i>       | 6p21.32    | GI_4504410-S                                     | -                                | n/s                |
| -                           | <i>IL2RA</i>          | 10p15.1    | GI_4557666-S                                     | -                                | n/s                |
| -                           | <i>IL7R</i>           | 5p13.2     | GI_28610150-S                                    | -                                | n/s                |
| -                           | <i>IL12A</i>          | 3q25.33    | GI_24430218-S                                    | -                                | n/s                |
| -                           | <i>IRF8 (ICSBP1)</i>  | 16q24.1    | GI_4504566-S                                     | -                                | n/s                |
| -                           | <i>STAT3</i>          | 17q21.2    | GI_21618337-A                                    | -                                | n/s                |
| -                           | <i>TNFRSF1A</i>       | 12p13.31   | GI_23312372-S                                    | -                                | n/s                |

Table SI. Continued.

F, rs2295827 (C/T) with IFN  $\alpha/\beta$  signalling pathway genes; Genetic Model, D; Genetic Factor, T

| Genotype number (frequency) | Gene symbol            | Chr. locus | Correlation between genotype and gene expression |                                  |         |
|-----------------------------|------------------------|------------|--------------------------------------------------|----------------------------------|---------|
|                             |                        |            | Expression chip probe GI                         | Expression level (mean $\pm$ SD) | P-value |
| -                           | <i>IFI6 (G1P3)</i>     | 1p36.11    | GI_13259551-A                                    | -                                | n/s     |
| -                           | <i>IFNA1</i>           | 9p21.3     | GI_13128949-S                                    | -                                | n/s     |
| -                           | <i>IFNAR1</i>          | 21q22.11   | GI_10835182-S                                    | -                                | n/s     |
| -                           | <i>IFNAR2</i>          | 21q22.11   | GI_19923128-S                                    | -                                | n/s     |
| -                           | <i>IFNB1</i>           | 9p21.3     | GI_4504602-S                                     | -                                | n/s     |
| -                           | <i>IRF1</i>            | 5q31.1     | GI_4504720-S                                     | -                                | n/s     |
| -                           | <i>IRF2</i>            | 4q35.1     | GI_4755144-S                                     | -                                | n/s     |
| -                           | <i>ISG15 (G1P2)</i>    | 1p36.33    | GI_4826773-S                                     | -                                | n/s     |
| -                           | <i>ISG54 (IFIT2)</i>   | 10q23.31   | GI_34222091-S                                    | -                                | n/s     |
| -                           | <i>ISGF3 (IRF9)</i>    | 14q12      | GI_25282406-S                                    | -                                | n/s     |
| -                           | <i>JAK1</i>            | 1p31.3     | GI_4504802-S                                     | -                                | n/s     |
| -                           | <i>PML</i>             | 15q24.1    | GI_15451762-I                                    | -                                | n/s     |
| -                           | <i>PML</i>             | 15q24.1    | GI_15451776-A                                    | -                                | n/s     |
| -                           | <i>PRMT1 (HRMT1L2)</i> | 19q13.33   | GI_38195083                                      | -                                | n/s     |
| -                           | <i>PRMT1 (HRMT1L2)</i> | 19q13.33   | GI_38195086-A                                    | -                                | n/s     |
| -                           | <i>PTP-1B (PTPN1)</i>  | 20q13.13   | GI_18104977-S                                    | -                                | n/s     |
| -                           | <i>SHP-1 (PTPN6)</i>   | 12p13.31   | GI_34328901-A                                    | -                                | n/s     |
| -                           | <i>SHP-1 (PTPN6)</i>   | 12p13.31   | GI_34328901-I                                    | -                                | n/s     |
| -                           | <i>SHP-1 (PTPN6)</i>   | 12p13.31   | GI_34328902-I                                    | -                                | n/s     |
| -                           | <i>SHP-2 (PTPN11)</i>  | 12q24.13   | GI_33356176-S                                    | -                                | n/s     |
| -                           | <i>SOCS1</i>           | 16p13.13   | GI_4507232-S                                     | -                                | n/s     |
| -                           | <i>STAT1</i>           | 2q32.2     | GI_21536299-I                                    | -                                | n/s     |
| -                           | <i>STAT1</i>           | 2q32.2     | GI_21536300-A                                    | -                                | n/s     |
| -                           | <i>STAT1</i>           | 2q32.2     | GI_21536300-I                                    | -                                | n/s     |
| -                           | <i>STAT2</i>           | 12q13.3    | GI_38202247-S                                    | -                                | n/s     |
| -                           | <i>TYK2</i>            | 19p13.2    | GI_34222294-S                                    | -                                | n/s     |
| -                           | <i>USP18</i>           | 22q11.21   | GI_32313609-S                                    | -                                | n/s     |

G, rs2348071 (G/A) with MS susceptible genes; Genetic Model, A; Genetic Factor, GA

| Genotype number (frequency) | Gene symbol           | Chr. locus | Correlation between genotype and gene expression |                                  |                     |
|-----------------------------|-----------------------|------------|--------------------------------------------------|----------------------------------|---------------------|
|                             |                       |            | Expression chip probe GI                         | Expression level (mean $\pm$ SD) | P-value             |
| -                           | <i>CD6</i>            | 11q12.2    | GI_5802993-S                                     | -                                | n/s                 |
| GG 76 (0.37)                | <i>CD58</i>           | 1p13.1     | GI_4502676-S                                     | 11.80 $\pm$ 0.26                 | 0.022 <sup>a</sup>  |
| GA 80 (0.38)                | -                     | -          | -                                                | 11.88 $\pm$ 0.23                 | -                   |
| AA 52 (0.25)                | -                     | -          | -                                                | 11.90 $\pm$ 0.23                 | -                   |
| -                           | <i>HLA-A</i>          | 6p22.1     | GI_24797066-S                                    | -                                | n/s                 |
| -                           | <i>HLA-B</i>          | 6p21.33    | GI_21327676-S                                    | -                                | n/s                 |
| -                           | <i>HLA-DRB1</i>       | 6p21.32    | GI_4504410-S                                     | -                                | n/s                 |
| -                           | <i>IL2RA</i>          | 10p15.1    | GI_4557666-S                                     | -                                | n/s                 |
| GG 76 (0.37)                | <i>IL7R</i>           | 5p13.2     | GI_28610150-S                                    | 6.31 $\pm$ 0.22                  | 0.0083 <sup>a</sup> |
| GA 80 (0.38)                | -                     | -          | -                                                | 6.26 $\pm$ 0.14                  | -                   |
| AA 52 (0.25)                | -                     | -          | -                                                | 6.22 $\pm$ 0.20                  | -                   |
| -                           | <i>IL12A</i>          | 3q25.33    | GI_24430218-S                                    | -                                | n/s                 |
| -                           | <i>IRF8 (ICSBP)</i>   | 16q24.1    | GI_4504566-S                                     | -                                | n/s                 |
| GG 76 (0.37)                | <i>STAT3</i>          | 17q21.2    | GI_21618337-A                                    | 11.00 $\pm$ 0.43                 | 0.0001 <sup>a</sup> |
| GA 80 (0.38)                | -                     | -          | -                                                | 11.09 $\pm$ 0.35                 | -                   |
| AA 52 (0.25)                | -                     | -          | -                                                | 11.26 $\pm$ 0.35                 | -                   |
| -                           | <i>TNFRSF1A</i>       | 12p13.31   | GI_23312372-S                                    | -                                | n/s                 |
| GG 76 (0.37)                | <i>TNFRSF5 (CD40)</i> | 20q13.12   | GI_23312370-A                                    | 9.86 $\pm$ 0.38                  | 0.0033 <sup>a</sup> |

Table SI. Continued.

G, rs2348071 (G/A) with MS susceptible genes; Genetic Model, A; Genetic Factor, GA

| Genotype number (frequency) | Gene symbol           | Chr. locus | Correlation between genotype and gene expression |                                  |         |
|-----------------------------|-----------------------|------------|--------------------------------------------------|----------------------------------|---------|
|                             |                       |            | Expression chip probe GI                         | Expression level (mean $\pm$ SD) | P-value |
| GA 80 (0.38)                | <i>TNFRSF5 (CD40)</i> | -          | -                                                | 10.01 $\pm$ 0.32                 | -       |
| AA 52 (0.25)                | <i>TNFRSF5 (CD40)</i> | -          | -                                                | 10.05 $\pm$ 0.37                 | -       |

G, rs2348071 (G/A) with IFN  $\alpha/\beta$  signalling pathway genes; Genetic Model, A; Genetic Factor, GA

| Genotype number (frequency) | Gene symbol              | Chr. locus    | Correlation between genotype and gene expression |                                  |                     |
|-----------------------------|--------------------------|---------------|--------------------------------------------------|----------------------------------|---------------------|
|                             |                          |               | Expression chip probe GI                         | Expression level (mean $\pm$ SD) | P-value             |
| GG 76 (0.37)                | <i>IFI6 (GIP3)</i>       | 1p36.11       | GI_13259551-A                                    | 12.47 $\pm$ 0.65                 | 0.029 <sup>a</sup>  |
| GA 80 (0.38)                | -                        | -             | -                                                | 12.60 $\pm$ 0.49                 | -                   |
| AA 52 (0.25)                | -                        | -             | -                                                | 12.69 $\pm$ 0.48                 | -                   |
| -                           | <i>IFNA1 (IFN-alpha)</i> | 9p21.3        | GI_13128949-S                                    | -                                | n/s                 |
| -                           | <i>IFNAR1</i>            | 21q22.11      | GI_10835182-S                                    | -                                | n/s                 |
| -                           | <i>IFNAR2</i>            | 21q22.11      | GI_19923128-S                                    | -                                | n/s                 |
| -                           | <i>IFNB1</i>             | 9p21.3        | GI_4504602-S                                     | -                                | n/s                 |
| -                           | <i>IRF1</i>              | 5q31.1        | GI_4504720-S                                     | -                                | n/s                 |
| GG 76 (0.37)                | <i>IRF2</i>              | 4q35.1        | GI_4755144-S                                     | 7.63 $\pm$ 0.39                  | 0.011 <sup>a</sup>  |
| GA 80 (0.38)                | -                        | -             | -                                                | 7.71 $\pm$ 0.40                  | -                   |
| AA 52 (0.25)                | -                        | -             | -                                                | 7.81 $\pm$ 0.36                  | -                   |
| -                           | <i>ISG15 (GIP2)</i>      | 1p36.33       | GI_4826773-S                                     | -                                | n/s                 |
| -                           | <i>ISG54 (IFIT2)</i>     | 10q23.31      | GI_34222091-S                                    | -                                | n/s                 |
| -                           | <i>ISGF3 (IRF9)</i>      | 14q12         | GI_25282406-S                                    | -                                | n/s                 |
| -                           | <i>JAK1</i>              | 1p31.3        | GI_4504802-S                                     | -                                | n/s                 |
| -                           | <i>PML (MYL)</i>         | 15q24.1       | GI_15451762-I                                    | -                                | n/s                 |
| -                           | -                        | GI_15451776-A | -                                                | n/s                              | -                   |
| GG 76 (0.37)                | <i>PRMT1 (HRMT1L2)</i>   | 19q13.33      | GI_38195083-I                                    | 6.96 $\pm$ 0.15                  | 0.017 <sup>a</sup>  |
| GA 80 (0.38)                | <i>PRMT1 (HRMT1L2)</i>   | 19q13.33      | GI_38195083-I                                    | 7.00 $\pm$ 0.14                  | -                   |
| AA 52 (0.25)                | <i>PRMT1 (HRMT1L2)</i>   | 19q13.33      | GI_38195083-I                                    | 7.02 $\pm$ 0.15                  | -                   |
| GG 76 (0.37)                | <i>PRMT1 (HRMT1L2)</i>   | 19q13.33      | GI_38195086-A                                    | 11.70 $\pm$ 0.23                 | 0.033 <sup>a</sup>  |
| GA 80 (0.38)                | <i>PRMT1 (HRMT1L2)</i>   | 19q13.33      | GI_38195086-A                                    | 11.80 $\pm$ 0.24                 | -                   |
| AA 52 (0.25)                | <i>PRMT1 (HRMT1L2)</i>   | 19q13.33      | GI_38195086-A                                    | 11.78 $\pm$ 0.21                 | -                   |
| GG 76 (0.37)                | <i>PTP-1B (PTPN1)</i>    | 20q13.13      | GI_18104977-S                                    | 11.03 $\pm$ 0.28                 | 0.0004 <sup>a</sup> |
| GA 80 (0.38)                | <i>PTP-1B (PTPN1)</i>    | -             | -                                                | 11.08 $\pm$ 0.20                 | -                   |
| AA 52 (0.25)                | <i>PTP-1B (PTPN1)</i>    | -             | -                                                | 11.18 $\pm$ 0.21                 | -                   |
| -                           | <i>SHP-1 (PTPN6)</i>     | 12p13.31      | GI_34328901-A                                    | -                                | n/s                 |
| -                           | <i>SHP-1 (PTPN6)</i>     | -             | GI_34328901-I                                    | -                                | n/s                 |
| -                           | <i>SHP-1 (PTPN6)</i>     | -             | GI_34328902-I                                    | -                                | n/s                 |
| GG 76 (0.37)                | <i>SHP-2 (PTPN11)</i>    | 12q24.13      | GI_33356176-S                                    | 9.72 $\pm$ 0.34                  | 0.010 <sup>a</sup>  |
| GA 80 (0.38)                | <i>SHP-2 (PTPN11)</i>    | -             | -                                                | 9.81 $\pm$ 0.28                  | -                   |
| AA 52 (0.25)                | <i>SHP-2 (PTPN11)</i>    | -             | -                                                | 9.86 $\pm$ 0.24                  | -                   |
| -                           | <i>SOCS1</i>             | 16p13.13      | GI_4507232-S                                     | -                                | n/s                 |
| -                           | <i>STAT1</i>             | 2q32.2        | GI_21536299-I                                    | -                                | n/s                 |
| -                           | -                        | GI_21536300-A | -                                                | n/s                              | -                   |
| -                           | -                        | GI_21536300-I | -                                                | n/s                              | -                   |
| -                           | <i>STAT2</i>             | 12q13.3       | GI_38202247-S                                    | -                                | n/s                 |
| -                           | <i>TYK2</i>              | 19p13.2       | GI_34222294-S                                    | -                                | n/s                 |
| GG 76 (0.37)                | <i>USP18</i>             | 22q11.21      | GI_32313609-S                                    | 9.65 $\pm$ 0.67                  | 0.0004 <sup>a</sup> |
| GA 80 (0.38)                | -                        | -             | -                                                | 9.95 $\pm$ 0.47                  | -                   |
| AA 52 (0.25)                | -                        | -             | -                                                | 10.00 $\pm$ 0.52                 | -                   |

<sup>a</sup>Combine P-value of statistical analysis of all genotypes of SNP in the specific genetic model; genotype number (frequency) is given for HapMap unrelated subjects of CEU, YRI, HCB and JPT HapMap populations grouped in one HapMap unrelated subjects cohort. Expression level (mean  $\pm$  SD) is indicated only if Spearman correlation (difference) is statistically significant. n/s, no statistically significant result.

Table SII. Summary on the genotype - phenotype correlation used in the genes whose expression levels in lymphoblastic cell lines are correlated with SNP genotype in the dominant model for the rs1048990, rs2295826 and rs2295827 and in the additive model for the rs2348071.

| A, <i>MS susceptibility genes</i>                                |                            | Spearman correlation                                     |                                                                                                                                |           |           |           |           |
|------------------------------------------------------------------|----------------------------|----------------------------------------------------------|--------------------------------------------------------------------------------------------------------------------------------|-----------|-----------|-----------|-----------|
| Gene symbol                                                      | Chr. location <sup>a</sup> | Protein encoded                                          | GO annotation                                                                                                                  | rs1048990 | rs2295826 | rs2295827 | rs2348071 |
| <i>CD58</i>                                                      | 1p13.1                     | Lymphocyte function-associated antigen 3                 | Signalling receptor binding                                                                                                    | Yes       | No        | No        | Yes       |
| <i>HLA-A</i>                                                     | 6p22.1                     | HLA class I histocompatibility antigen, A-2 alpha chain  | Peptide antigen binding and receptor binding                                                                                   | Yes       | No        | No        | No        |
| <i>HLA-B</i>                                                     | 6p22.1                     | HLA class I histocompatibility antigen, B-51 alpha chain | Peptide antigen binding and receptor binding                                                                                   | No        | Yes       | Yes       | No        |
| <i>IL7R</i>                                                      | 5p13.2                     | Interleukin-7 receptor subunit alpha                     | Antigen binding <i>and</i> interleukin-7 receptor activity.                                                                    | Yes       | No        | No        | Yes       |
| <i>STAT3</i>                                                     | -                          | Signal Transducer And Activator Of Transcription 3       | DNA-binding transcription factor activity and sequence-specific DNA binding.                                                   | Yes       | No        | No        | Yes       |
| <i>TNFRSF5 (CD40)</i>                                            | 20q13.12                   | Tumour necrosis factor receptor superfamily member 5     | Identical protein binding and protein kinase activity.                                                                         | Yes       | No        | No        | Yes       |
| B, <i>IFN <math>\alpha/\beta</math> signalling pathway genes</i> |                            | Spearman correlation                                     |                                                                                                                                |           |           |           |           |
| Gene symbol                                                      | Chr. location <sup>a</sup> | Protein encoded                                          | GO annotation                                                                                                                  | rs1048990 | rs2295826 | rs2295827 | rs2348071 |
| <i>IFI6 (GIP3)</i>                                               | 1p35.3                     | Interferon Alpha Inducible Protein 6                     | Pro-apoptotic activity                                                                                                         | No        | No        | No        | Yes       |
| <i>IFNA1 (IFN <math>\alpha</math>)</i>                           | 9p21.3                     | Interferon alpha 1/13                                    | Cytokine activity <i>and</i> type I interferon receptor binding.                                                               | Yes       | No        | No        | No        |
| <i>IRF1</i>                                                      | 5q31.1                     | Interferon regulatory factor 1                           | DNA-binding transcription factor activity <i>and</i> RNA polymerase II proximal promoter sequence-specific DNA binding.        | Yes       | No        | No        | No        |
| <i>IRF2</i>                                                      | 4q35.1                     | Interferon regulatory factor 2                           | DNA-binding transcription factor activity <i>and</i> DNA-binding transcription activator activity, RNA polymerase II-specific. | No        | No        | No        | Yes       |
| <i>PRMT1 (HMRT1L2)</i>                                           | 19q13.33                   | Protein arginine methyltransferase 1                     | Methyltransferase activity                                                                                                     | No        | No        | No        | Yes       |
| <i>PTP-1B (PTPN1)</i>                                            | 20q13.13                   | Protein tyrosine phosphatase, non-receptor type 1        | Enzyme binding.                                                                                                                | Yes       | No        | No        | Yes       |
| <i>SHP-2 (PTPN11)</i>                                            | 12q24.13                   | Tyrosine-protein phosphatase non-receptor type 11        | Protein domain specific binding <i>and</i> protein tyrosine phosphatase activity.                                              | No        | No        | No        | Yes       |

Table SII. Continued.

| B, <i>IFN</i> $\alpha/\beta$ signalling pathway genes |                            |                                           |                                                                                                              |           |           |                      |
|-------------------------------------------------------|----------------------------|-------------------------------------------|--------------------------------------------------------------------------------------------------------------|-----------|-----------|----------------------|
| Gene symbol                                           | Chr. location <sup>a</sup> | Protein encoded                           | GO annotation                                                                                                | rs1048990 | rs2295826 | rs2295827            |
|                                                       |                            |                                           |                                                                                                              |           |           | Spearman correlation |
| <i>TYK2</i>                                           | 19p13.2                    | Non-receptor tyrosine-protein kinase TYK2 | Transferase activity, transferring phosphorus-containing groups <i>and</i> protein tyrosine kinase activity. | Yes       | No        | No                   |
| <i>USP18</i>                                          | 22q11.2                    | Ubl carboxyl-terminal hydrolase 18        | Cysteine-type endopeptidase activity <i>and</i> thiol-dependent ubiquitinyl hydrolase activity.              | Yes       | No        | No                   |
|                                                       |                            |                                           |                                                                                                              |           |           | rs2348071            |

<sup>a</sup>Cytogenetic band is given according to the Ensembl database; GO, gene ontology.



Table SIII. Spectrum and frequency of the 4 loci genotypes in patients with multiple sclerosis and healthy individuals and data on the association with disease.

| ID     | 4 LG composition (L1-L2-L3-L4)     | Frequency in the group (n %) |                  | Association by frequency in additive model |                  |
|--------|------------------------------------|------------------------------|------------------|--------------------------------------------|------------------|
|        |                                    | MS (n=280)                   | Controls (n=305) | P-value                                    | OR [95% CI]      |
| 4-LG1  | CC-CC-AA-GG <sup>a</sup>           | 52 (18.57)                   | 86 (28.19)       | 0.0312                                     | 0.66 [0.45-0.96] |
| 4-LG2  | CC-CC-AA-(GA+AA)                   | 65 (23.21)                   | 81 (26.56)       | n/s                                        | -                |
| 4-LG3  | CC-CC-(AG+GG)-GG                   | 18 (6.43)                    | 24 (7.87)        | n/s                                        | -                |
| 4-LG4  | CC-(CG+GG)-AA-GG                   | 18 (6.43)                    | 22 (7.21)        | n/s                                        | -                |
| 4-LG5  | CC-(CG+GG)-AA-(GA+AA)              | 19 (6.79)                    | 18 (5.90)        | n/s                                        | -                |
| 4-LG6  | CA-CC-AA-(GA+AA)                   | 16 (5.71)                    | 18 (5.90)        | n/s                                        | -                |
| 4-LG7  | CC-CC-(AG+GG)-(GA+AA) <sup>b</sup> | 47 (16.79)                   | 17 (5.57)        | 0.0001                                     | 3.01 [1.70-5.33] |
| 4-LG8  | CA-CC-AA-GG                        | 17 (6.07)                    | 16 (5.25)        | n/s                                        | -                |
| 4-LG9  | CC-(CG+GG)-(AG+GG)-GG              | 5 (1.79)                     | 8 (2.62)         | -                                          | -                |
| 4-LG10 | CC-(CG+GG)-(AG+GG)-(GA+AA)         | 5 (1.79)                     | 5 (1.64)         | -                                          | -                |
| 4-LG11 | CA-CC-(AG+GG)-GG                   | 8 (2.86)                     | 4 (1.31)         | -                                          | -                |
| 4-LG12 | CA-CC-(AG+GG)-(GA+AA)              | 10 (3.57)                    | 4 (1.31)         | -                                          | -                |
| 4-LG13 | CA-(CG+GG)-AA-GG                   | 0 (0.00)                     | 1 (0.33)         | -                                          | -                |
| 4-LG14 | CA-(CG+GG)-AA-(GA+AA)              | 0 (0.00)                     | 1 (0.33)         | -                                          | -                |

4 LG, 4 loci genotype; L1, L2, L3 and L4 indicate the rs2277460, rs1048990, rs2295826 and rs2348071 loci, respectively. The rs2295826 locus represents linkage block rs2295826 - rs2295827. <sup>a</sup>P<0.05, and <sup>b</sup>P≤0.0001. CI, confidence interval; OR, odds ratio; MS, multiple sclerosis; n/s, no statistical results; -, no statistical analysis made.

Table SIV. Allelic composition frequency of the 5 loci haplotypes in patients with multiple sclerosis and healthy individuals.

| ID    | 1-2-3-4-5          | Frequency in the group, [n (%)] |                 | Association by frequency<br>in additive model<br>P-value | Association by frequency<br>in additive model<br>OR [95% CI] |
|-------|--------------------|---------------------------------|-----------------|----------------------------------------------------------|--------------------------------------------------------------|
|       |                    | MS (n=560)                      | Control (n=610) |                                                          |                                                              |
| Hap1  | CCACG              | 258 (46.07)                     | 311 (50.98)     | n/s                                                      | -                                                            |
| Hap2  | CCACA              | 108 (19.29)                     | 142 (23.28)     | n/s                                                      | -                                                            |
| Hap3  | CCGTG              | 31 (5.54)                       | 49 (8.03)       | n/s                                                      | -                                                            |
| Hap4  | CGACG              | 45 (8.04)                       | 41 (6.72)       | n/s                                                      | -                                                            |
| Hap5  | ACACA              | 1 (0.18)                        | 23 (3.77)       | n/s                                                      | -                                                            |
| Hap6  | ACACG <sup>a</sup> | 47 (8.39)                       | 21 (3.44)       | 0.00060                                                  | 2.44 [1.45-4.11]                                             |
| Hap7  | CGGTG              | 0 (0.00)                        | 13 (2.14)       | -                                                        | -                                                            |
| Hap8  | CCGTA <sup>a</sup> | 62 (11.07)                      | 7 (1.15)        | <0.00010                                                 | 9.65 [4.49-20.76]                                            |
| Hap9  | CGACA              | 5 (0.89)                        | 3 (0.49)        | n/s                                                      | -                                                            |
| Hap10 | ACGTG              | 3 (0.54)                        | -               | -                                                        | -                                                            |

<sup>a</sup>At risk haplotypes; Hap, haplotype; L1, L2, L3, L4 and L5 indicate the rs2277460, rs1048990, rs2295826, rs2295827 and rs2348071 loci, respectively; MS, multiple sclerosis; n/s - no statistical results; -, no statistical analyse made; CI, confidence interval; OR, odds ratio.
